# Supplementary material
Source: PubMed Central journal article supplement (PMC4314251)
Supplement: ehp.1408614.s001.508.pdf [file ehp.1408614.s001.508.pdf]

## **Supplemental Material**

# **Prenatal Exposure to Maternal Cigarette Smoking and DNA Methylation: Epigenome-Wide Association in a Discovery Sample of Adolescents and Replication in an Independent Cohort at Birth through 17 Years of Age**

Ken W. K. Lee, Rebecca Richmond, Pingzhao Hu, Leon French, Jean Shin, Celine Bourdon, Eva Reischl, Melanie Waldenberger, Sonja Zeilinger, Tom Gaunt, Wendy McArdle, Susan Ring, Geoff Woodward, Luigi Bouchard, Daniel Gaudet, George Davey-Smith, Caroline Relton, Tomas Paus, and Zdenka Pausova

**A)**

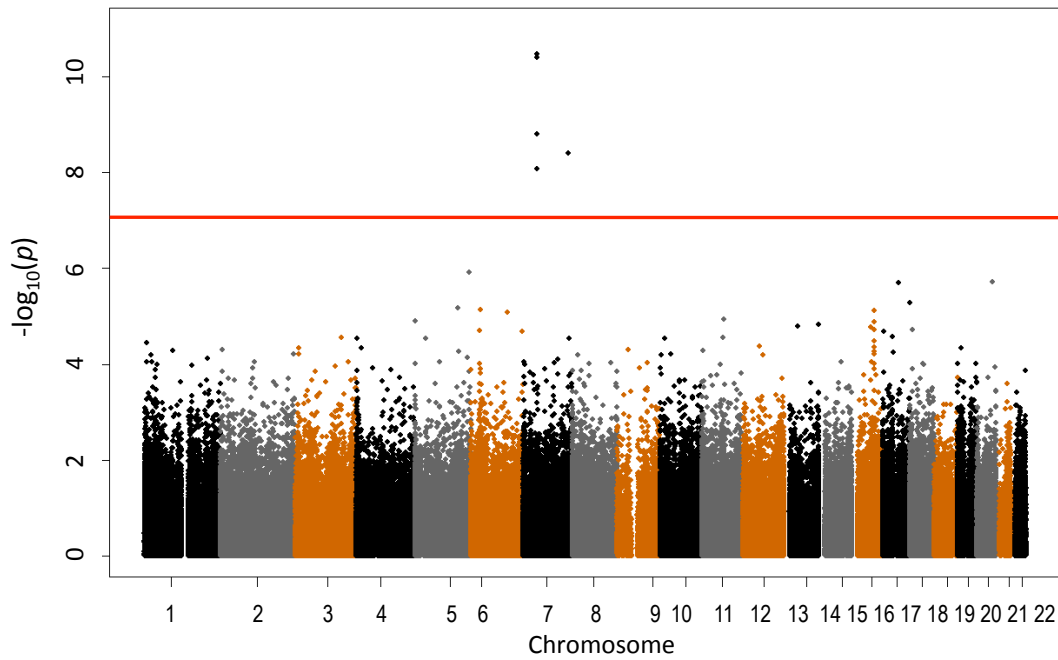

**B)**

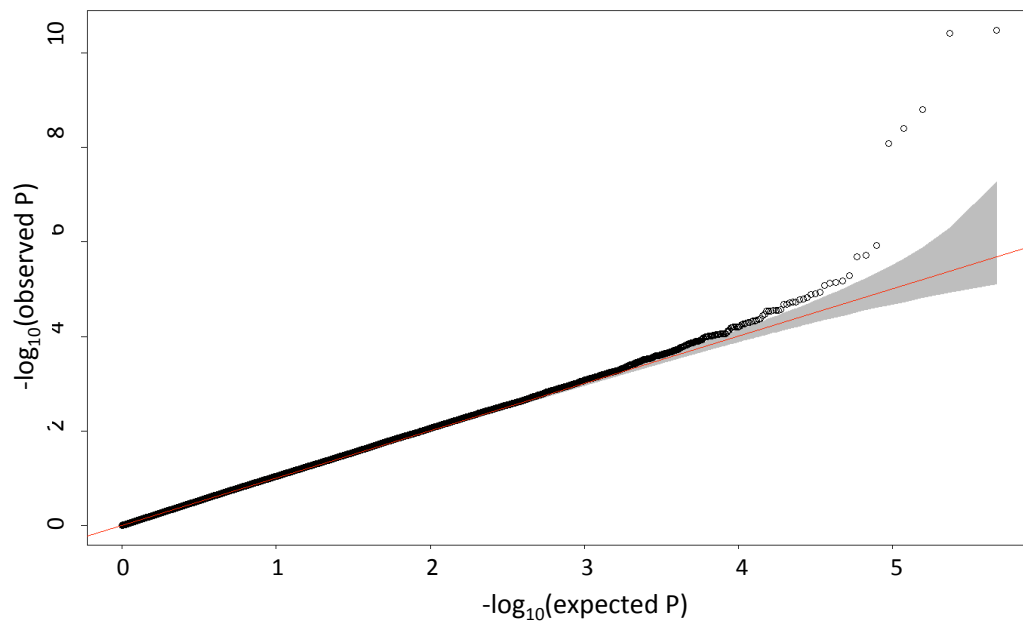

**Figure S1.** EWAS in the discovery SYS sample – Manhattan and quantile-quantile plots. (A) Manhattan plot for Model A (adjusted for age, sex, batch and blood cell fractions) is shown. Horizontal line indicates Bonferroni-corrected statistical significance at  $p < 0.05$  (uncorrected  $p = 1.1 \times 10^{-7}$ ). (B) Quantile-quantile plot for Model A (adjusted for age, sex, batch and blood cell fractions) is presented. P-values for observed vs. expected association strength are shown. The  $y=x$  line is indicated as solid diagonal line.

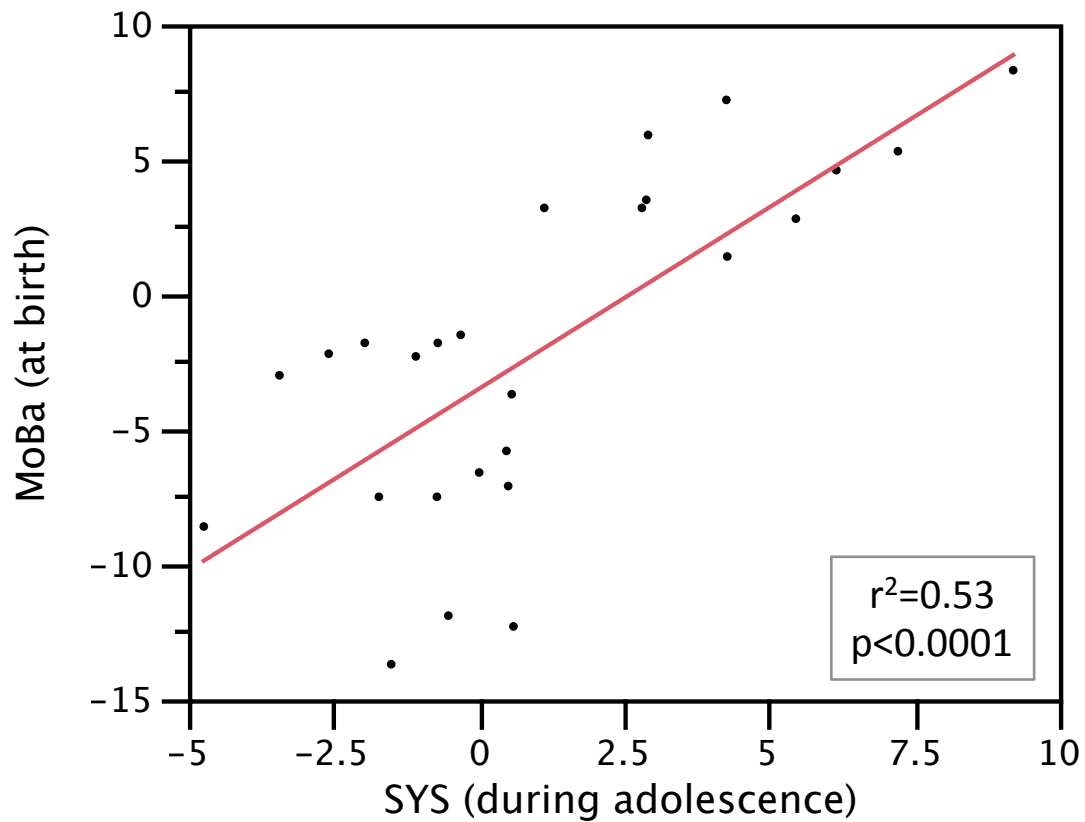

**Figure S2.** EWAS-significant CpGs from the MoBa sample of newborns\* in the discovery SYS sample of adolescents. Adjusted differences in DNAm  $\beta$  values between exposed and non-exposed individuals (DNAm  $\beta$  differences) are plotted. Pearson correlation test was performed.

\*Joubert, B.R. et al. (2012) *Environ Health Perspect*, 120, 1425-1431.

**Table S1.** Basic characteristics of ALSPAC participants at birth (n = 441) and ages 7 (n = 447) and 17 years (n = 219) (replication cohort).

| Characteristic                                                                 | At birth<br>NE | At birth<br>E   | P-value | Age 7<br>NE    | Age 7<br>E      | P-value | Age 17<br>NE   | Age 17<br>E    | P-value |
|--------------------------------------------------------------------------------|----------------|-----------------|---------|----------------|-----------------|---------|----------------|----------------|---------|
| No.                                                                            | 402            | 39              |         | 408            | 39              |         | 206            | 13             |         |
| Sex (males/females)                                                            | 210/192        | 17/22           | 0.3     | 206/202        | 17/22           | 0.41    | 85/121         | 5/8            | 0.84    |
| Age (years)                                                                    | 0              | 0               | N/A     | 7.5 ± 0.12     | 7.5 ± 0.20      | 0.21    | 17.7 ± 0.3     | 17.6 ± 0.6     | 0.95    |
| Maternal education<br>(proportions, %)*                                        | 14/34/33/19    | 31/49/15/5      | 0.001   | 13/34/35/18    | 31/49/18/2      | <0.001  | 12/33/37/18    | 23/46/31/0     | 0.22    |
| Parental social class<br>(proportions, %)**                                    | 21/43/27/5/4/0 | 3/28/20/36/10/3 | <0.001  | 22/42/27/6/3/0 | 2/24/23/33/15/3 | <0.001  | 26/41/25/6/2/0 | 7/31/23/23/8/8 | <0.001  |
| Maternal cigarette<br>smoking (1 <sup>st</sup> trimester, #<br>cigarettes/day) | 0              | 13.8 ± 6.0      | N/A     | 0              | 13.3 ± 6.1      | N/A     | 0              | 13.9 ± 6.0     | N/A     |
| Maternal cigarette<br>smoking (2 <sup>nd</sup> trimester, #<br>cigarettes/day) | 0              | 12.8 ± 5.1      | N/A     | 0              | 12.5 ± 5.2      | N/A     | 0              | 12.4 ± 5.9     | N/A     |
| Maternal cigarette<br>smoking (3 <sup>rd</sup> trimester, #<br>cigarettes/day) | 0              | 12.3 ± 5.5      | N/A     | 0              | 12.2 ± 5.6      | N/A     | 0              | 13.0 ± 6.4     | N/A     |
| Maternal age at delivery<br>(years)                                            | 30.0 ± 4.2     | 27.7 ± 5.7      | 0.004   | 29.9 ± 4.3     | 27.4 ± 5.8      | 0.002   | 30.1 ± 4.4     | 27.8 ± 5.3     | 0.07    |
| Length of gestation<br>(weeks)                                                 | 39.6 ± 1.5     | 38.9 ± 2.4      | 0.03    | 39.5 ± 1.5     | 38.9 ± 2.4      | 0.02    | 39.5 ± 1.4     | 38.7 ± 2.9     | 0.06    |
| Birth weight (g)                                                               | 3488 ± 482     | 3139 ± 490      | <0.001  | 3500 ± 487     | 3171 ± 496      | <0.001  | 3432 ± 441     | 3090 ± 521     | 0.008   |
| Participant smoking<br>(proportions, %)                                        | N/A            | N/A             | N/A     | N/A            | N/A             | N/A     | 12             | 50             | 0.003   |
| Postnatal parent<br>smoking (proportions, %)                                   | N/A            | N/A             | N/A     | 11.1           | 89              | <0.001  | 16             | 75             | <0.001  |

Data are presented as mean ± standard deviation. Exposed (E) and non-exposed (NE) indicates individuals who were and were not, respectively, exposed prenatally to maternal cigarette smoking.

\*Maternal education was classified as the highest achieved level: (i) vocational/CSE, (ii) O-level (passed examinations at age 16), (iii) A-level (passed examinations at age 18), or (iv) degree.

\*\*Parental social class was classified as follows: i) professional, ii) managerial or technical, iii-a) skilled non-manual, iii-b) skilled manual, iv) partly skilled manual, or v) unskilled manual.

**Table S2.** EWAS in the discovery sample of SYS adolescents (not adjusted for any potential confounders, all participants included [66 exposed vs. 66 non-exposed]).

| <b>CpG ID</b> | <b>Position</b> | <b>Gene</b>             | <b>DNAm <math>\beta</math> difference (SE)</b> | <b>P-value</b> |
|---------------|-----------------|-------------------------|------------------------------------------------|----------------|
| cg12803068    | 7: 44969444     | <i>MYO1G</i>            | 0.09 (0.01)                                    | 1.25E-11*      |
| cg04180046    | 7: 44969261     | <i>MYO1G</i>            | 0.07 (0.01)                                    | 5.06E-11*      |
| cg22132788    | 7: 44969011     | <i>MYO1G</i>            | 0.05 (0.01)                                    | 8.99E-10*      |
| cg25949550    | 7: 145445239    | <i>CNTNAP2</i>          | -0.02 (0.00)                                   | 1.65E-09*      |
| cg19089201    | 7: 44968812     | <i>MYO1G</i>            | 0.04 (0.01)                                    | 8.78E-09*      |
| cg25583601    | 5: 33476393     | <i>TARS</i>             | -0.01 (0.00)                                   | 1.35E-06       |
| cg17924476    | 5: 376794       | <i>AHRR</i>             | 0.03 (0.01)                                    | 1.54E-06       |
| cg23916896    | 5: 421804       | <i>AHRR</i>             | -0.04 (0.01)                                   | 1.88E-06       |
| cg15982595    | 13: 112349181   | <i>C13orf35</i>         | -0.01 (0.00)                                   | 2.91E-06       |
| cg00253658    | 16: 52767997    | NA                      | 0.07 (0.01)                                    | 4.48E-06       |
| cg14179389    | 1: 92720549     | <i>GFI1</i>             | -0.05 (0.01)                                   | 6.17E-06       |
| cg11902777    | 5: 421843       | <i>AHRR</i>             | -0.02 (0.00)                                   | 6.91E-06       |
| cg15507334    | 10: 14412919    | <i>FRMD4A</i>           | 0.03 (0.01)                                    | 7.81E-06       |
| cg23986376    | 6: 28935012     | NA                      | -0.02 (0.00)                                   | 1.02E-05       |
| cg04118462    | 3: 151012838    | <i>RNF1</i>             | -0.02 (0.00)                                   | 1.14E-05       |
| cg21330896    | 8: 28261624     | <i>ZNF395</i>           | -0.04 (0.01)                                   | 1.45E-05       |
| cg03521044    | 7: 20805089     | NA                      | -0.01 (0.00)                                   | 1.45E-05       |
| cg10805956    | 1: 154964248    | <i>ISG20L2; C1orf66</i> | -0.02 (0.00)                                   | 2.03E-05       |
| cg27214774    | 20: 48687117    | <i>FAM65C</i>           | 0.01 (0.00)                                    | 2.30E-05       |
| cg06841024    | 3: 12908799     | NA                      | -0.01 (0.00)                                   | 2.65E-05       |
| cg20232325    | 12: 129889375   | <i>STX2</i>             | -0.01 (0.00)                                   | 3.02E-05       |
| cg00729656    | 7: 98390638     | <i>TRRAP</i>            | -0.02 (0.00)                                   | 3.18E-05       |
| cg12050358    | 17: 33866435    | <i>ARHGAP23</i>         | -0.04 (0.01)                                   | 3.18E-05       |
| cg07576541    | 1: 151897507    | <i>SNAPIN</i>           | -0.02 (0.00)                                   | 3.22E-05       |
| cg12182991    | 3: 188939158    | <i>BCL6</i>             | -0.01 (0.00)                                   | 4.10E-05       |

Differential DNA methylation (DNAm) between adolescents exposed and non-exposed prenatally to maternal cigarette smoking was assessed with linear regression using M-values at 473,395 CpGs. The results are presented as adjusted mean differences in DNAm  $\beta$  values between exposed and non-exposed individuals (DNAm  $\beta$  difference) and their respective standard errors (SEs) and uncorrected (nominal) P-values. \* Indicates FDR-significance ( $p < 0.05$ ). Chromosome position (indicated by chromosome number followed by position) is based on the NCBI Human Reference Genome Assembly Build 37.p10.

## References

Joubert BR, Håberg SE, Nilsen RM, Wang X, Vollset SE, Murphy SK, Huang Z, Hoyo C, Midttun Ø, Cupul-Uicab LA, Ueland PM, Wu MC, Nystad W, Bell DA, Peddada SD, London SJ. 450K epigenome-wide scan identifies differential DNA methylation in newborns related to maternal smoking during pregnancy. *Environ Health Perspect.* 2012; 120: 1425-31.
